# Supplementary material
Source: publisher figshare collection journal article supplement (https://sage.figshare.com/ndownloader/files/14489354)

## Supplemental Material

*Supplementary Information.* Development of Word Reading, Phonological Skills, Orthographic Skills, Vocabulary Skills, Grammatical Skills, Discourse Skills of Story Comprehension across Grades among the Three Groups

*Note.* Results of univariate ANOVA post-hoc tests at each time point are marked in the figures,  $p < .05$ . Only significant group differences are marked.

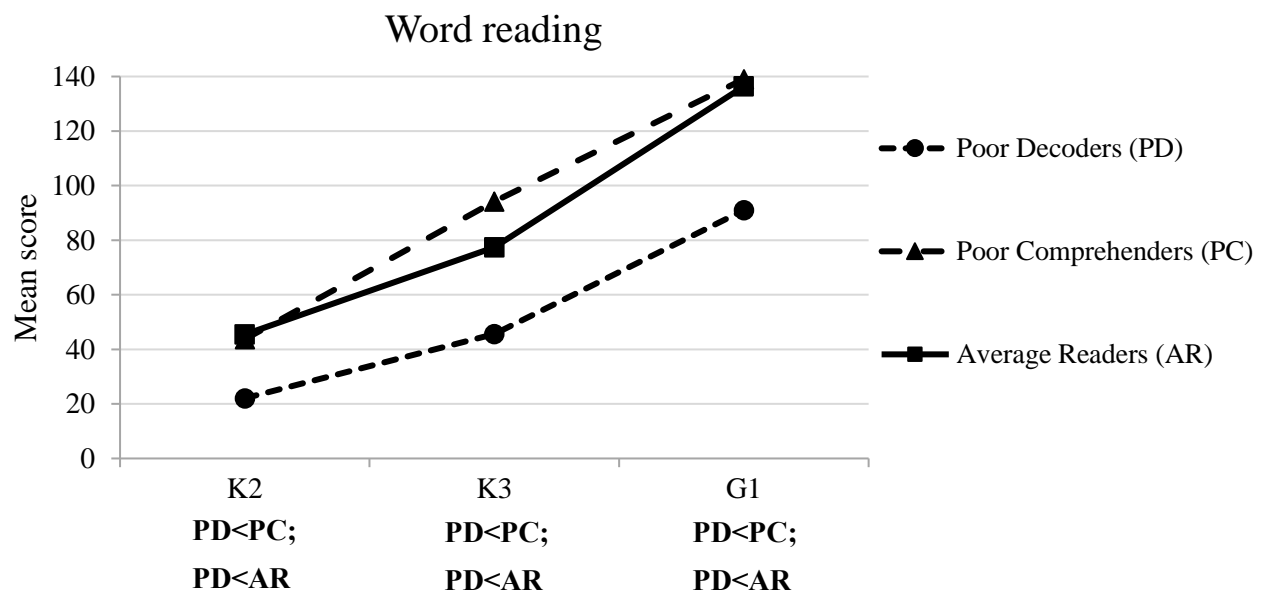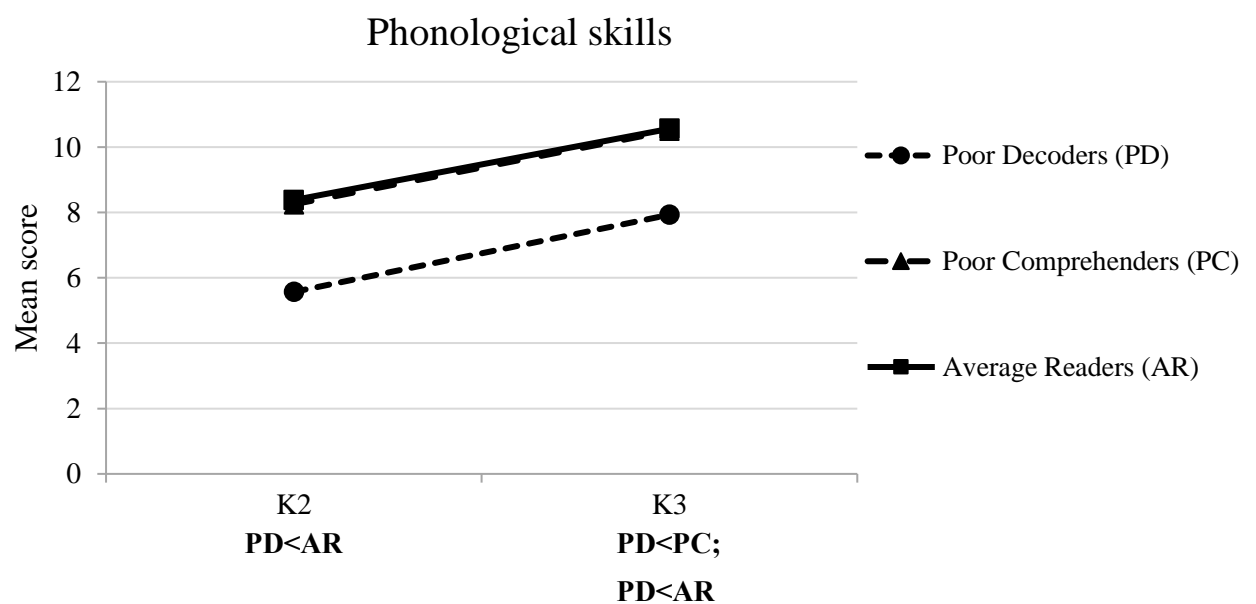

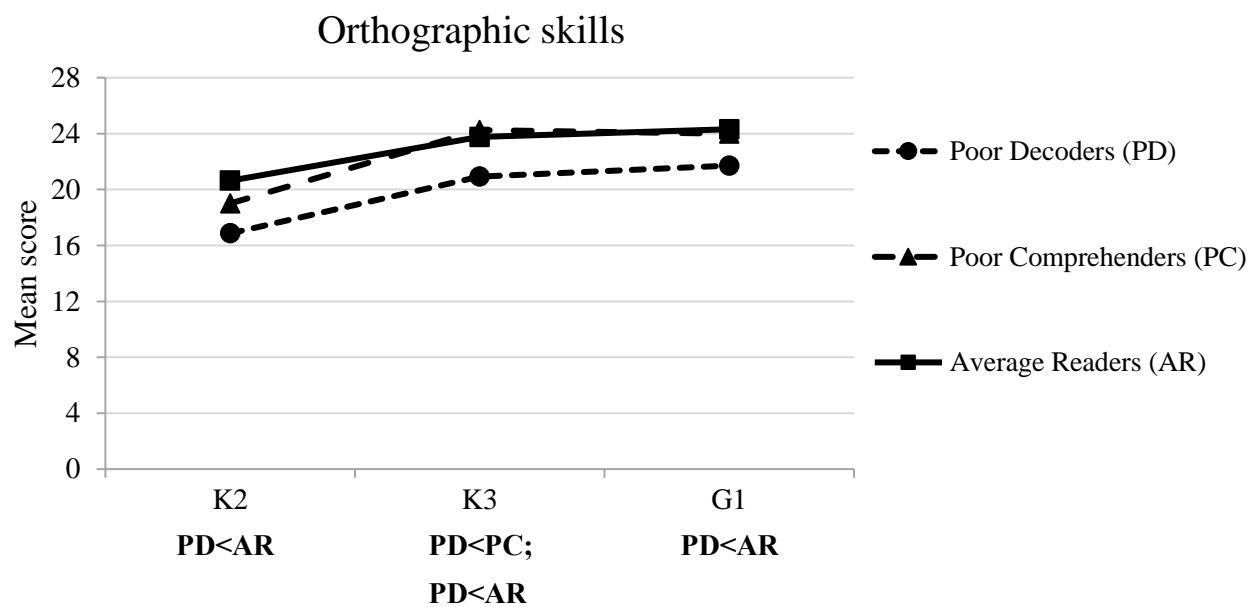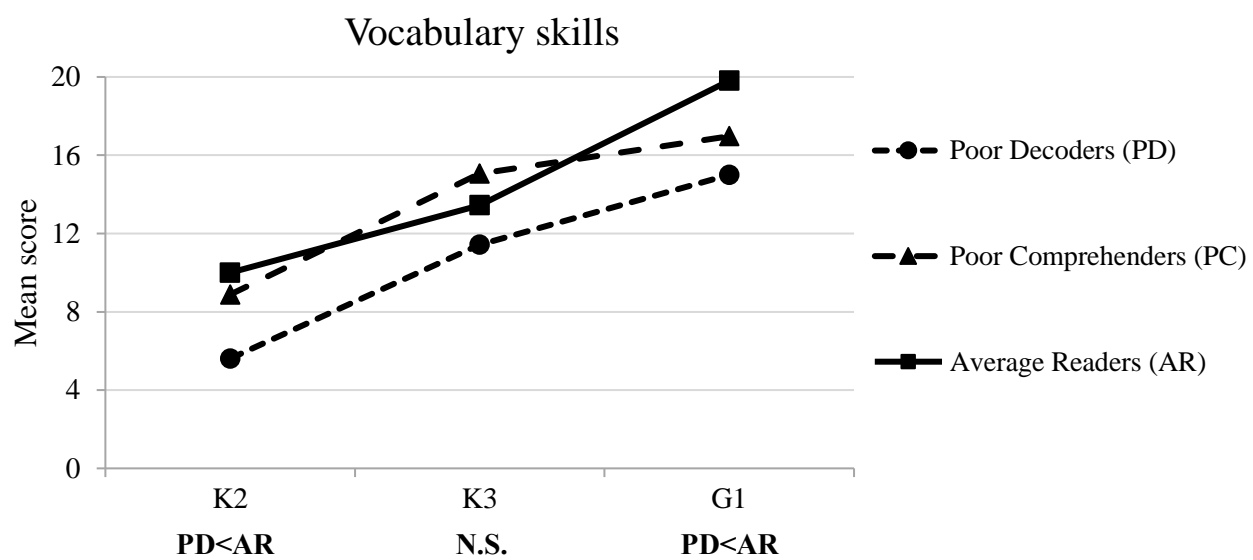

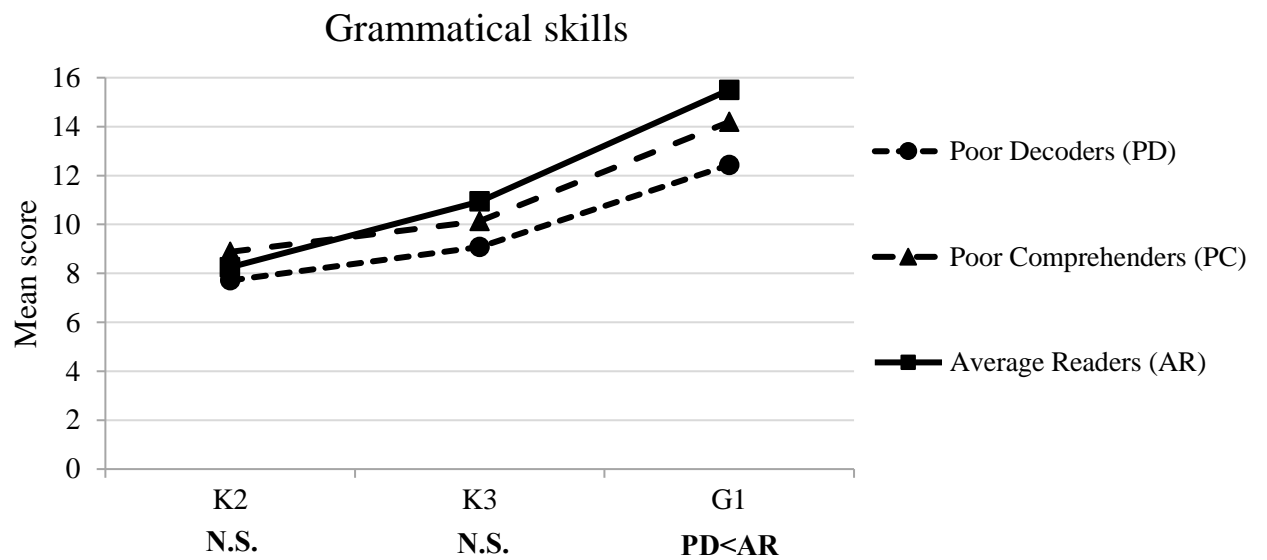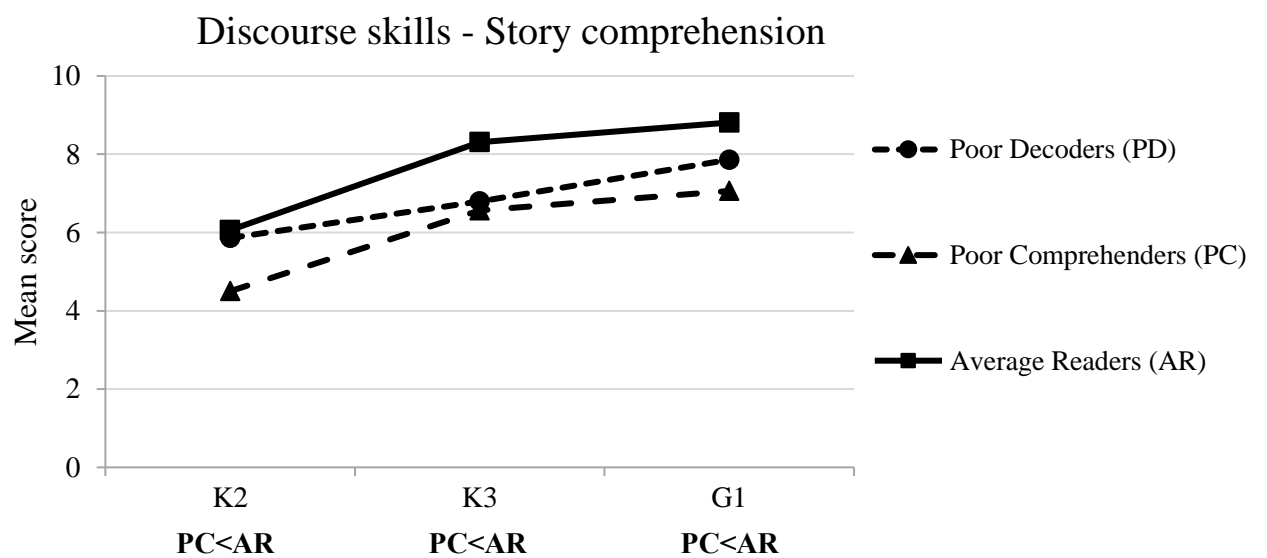

Supplement: Supplementary file 1 [file 14489354]
